# Supplementary material for: Design, Synthesis and Mechanistic Studies of Novel Isatin-Pyrazole Hydrazone Conjugates as Selective and Potent Bacterial MetAP Inhibitors
Source: MDPI journal article supplement (doi:10.3390/antibiotics11081126), 2022-08-19
Supplement: s1 [file s1]

**Design, synthesis and mechanistic studies of novel Isatin-pyrazole hydrazone  
conjugates as selective and potent bacterial MetAP Inhibitors**

## Table of contents

| Contents                                                                                                | Page No. |
|---------------------------------------------------------------------------------------------------------|----------|
| 1. Spectral data of all compounds (PS1-14)                                                              | S3-29    |
| 2. Table S1: Detail of environmental bacterial isolates                                                 | S30-30   |
| 3. Table S2: Zone of inhibition (mm) measured around the disk of various concentration of the compounds | S31-31   |
| 4. Physiochemical properties of the compounds                                                           | S32-32   |
| 5. Morrison Ki plots for MetAP against Isatin-pyrazole hydrazone conjugates                             | S33-35   |

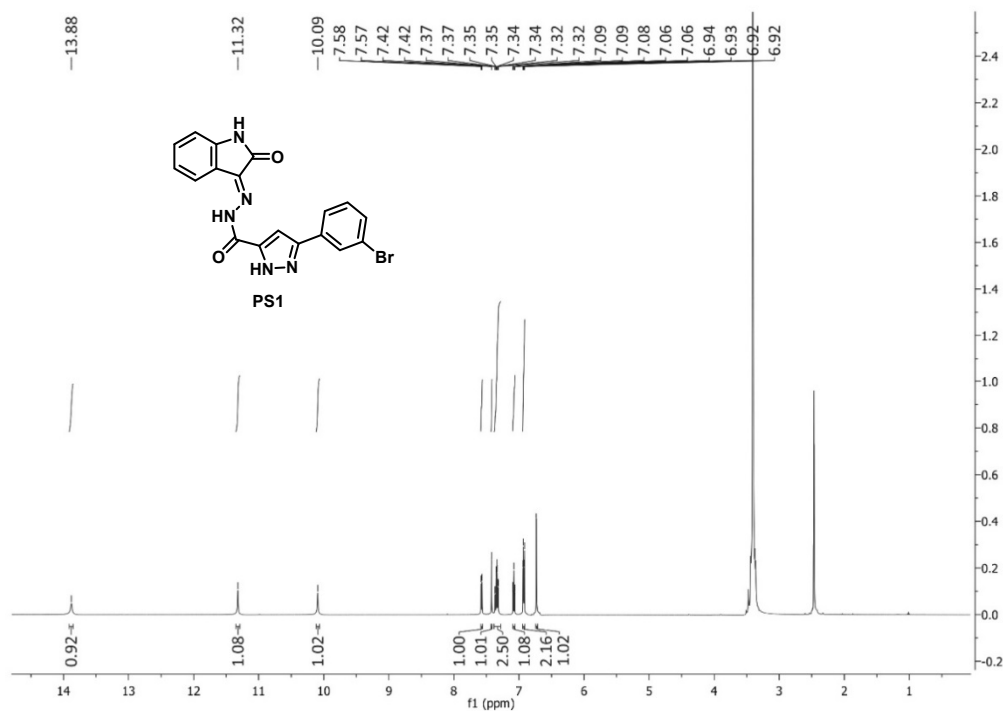

<sup>1</sup>H of compound PS1

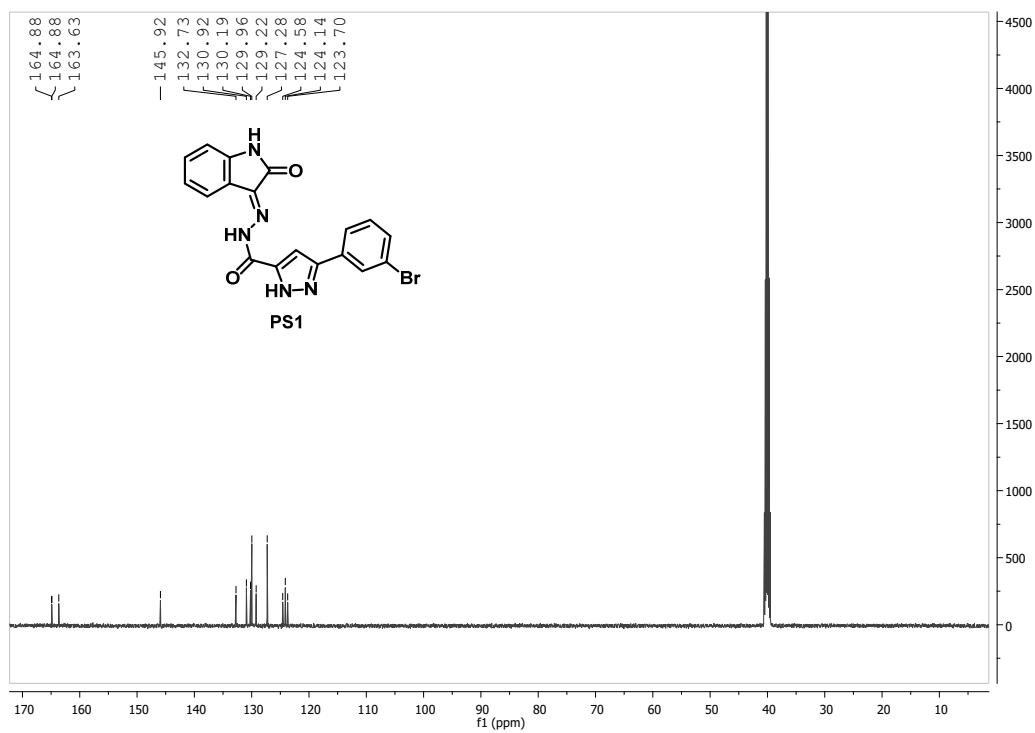

<sup>13</sup>C of compound PS1

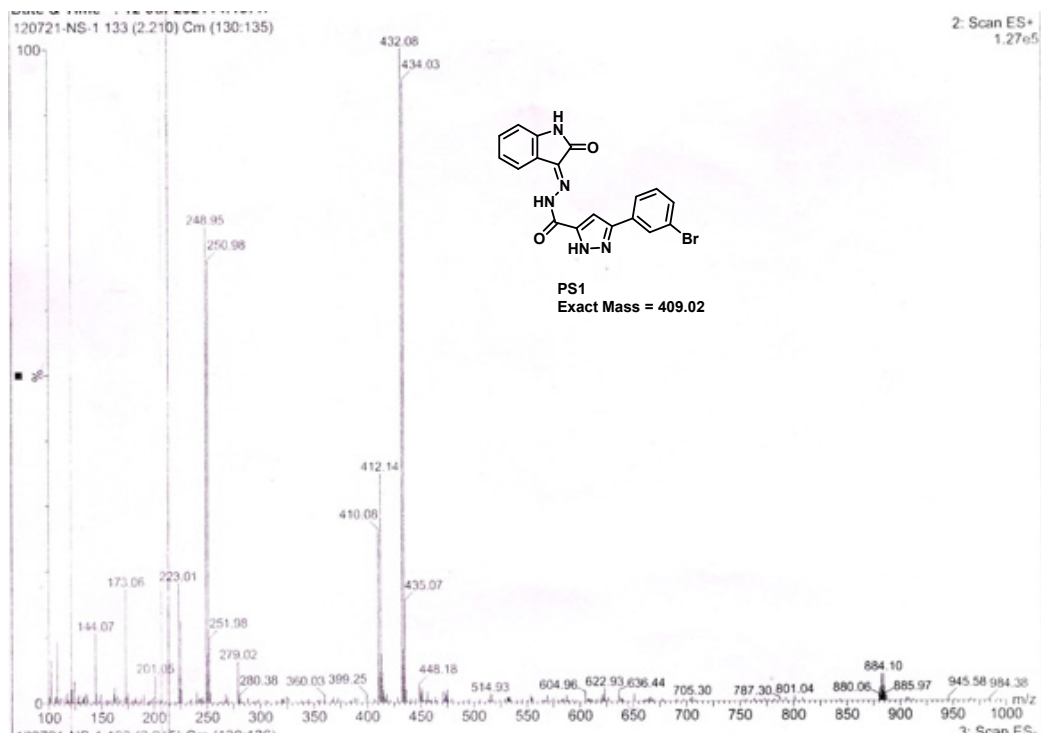

Mass spectra of compound PS1

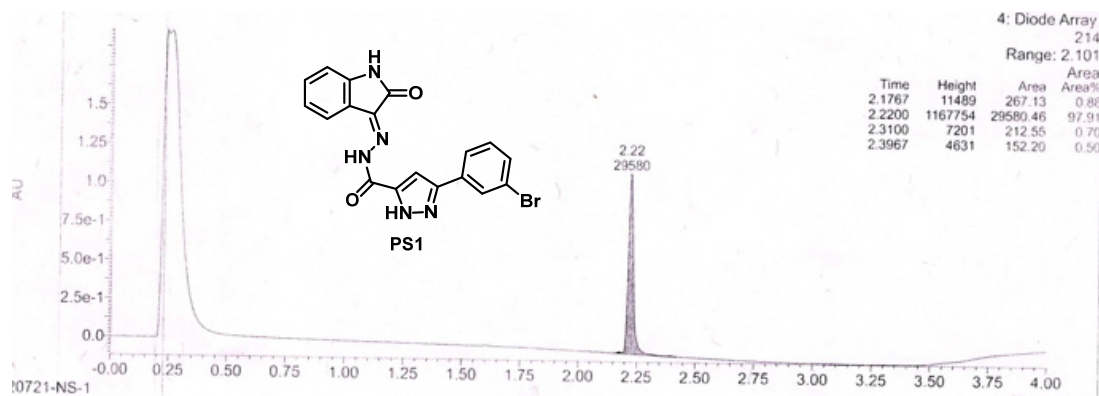

Purity of compound PS1

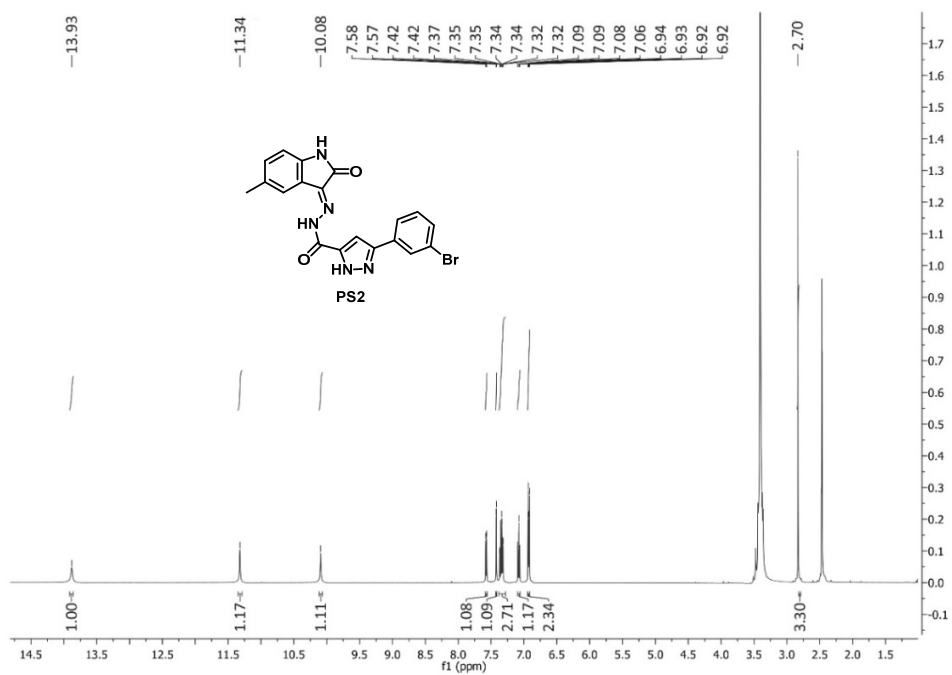

<sup>1</sup>H of compound PS2

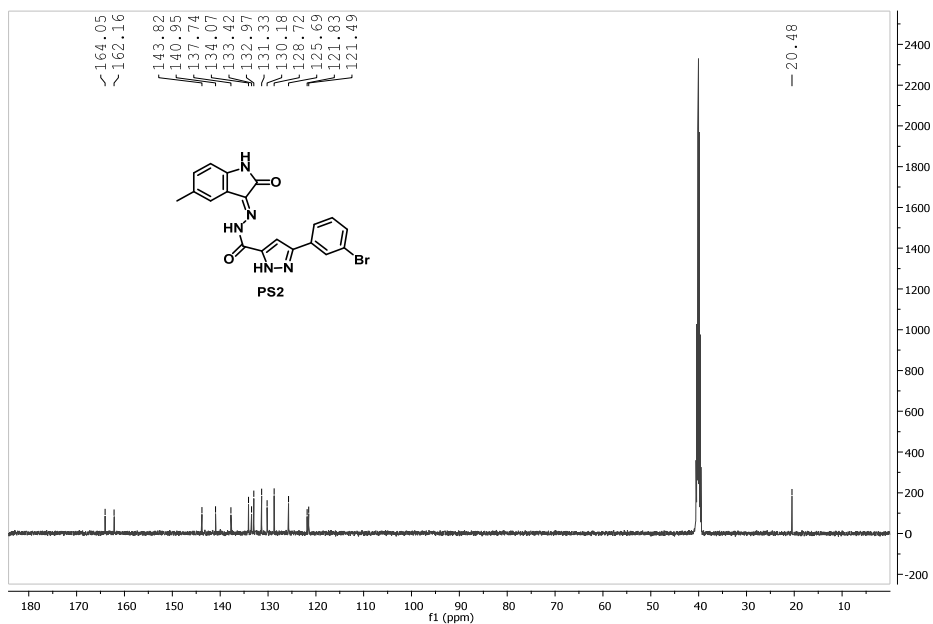

<sup>13</sup>C of compound PS2

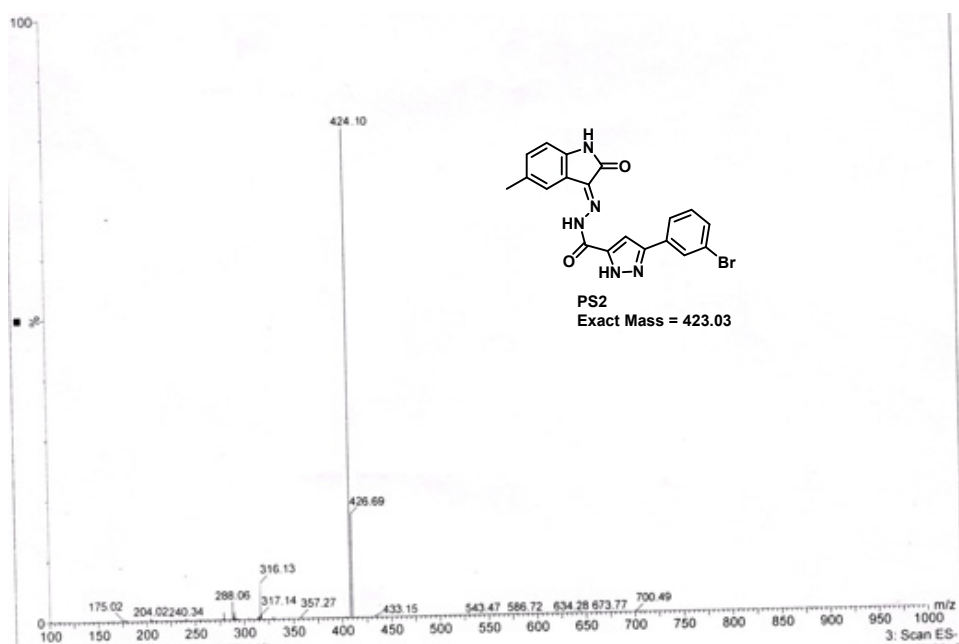

Mass spectra of compound PS2

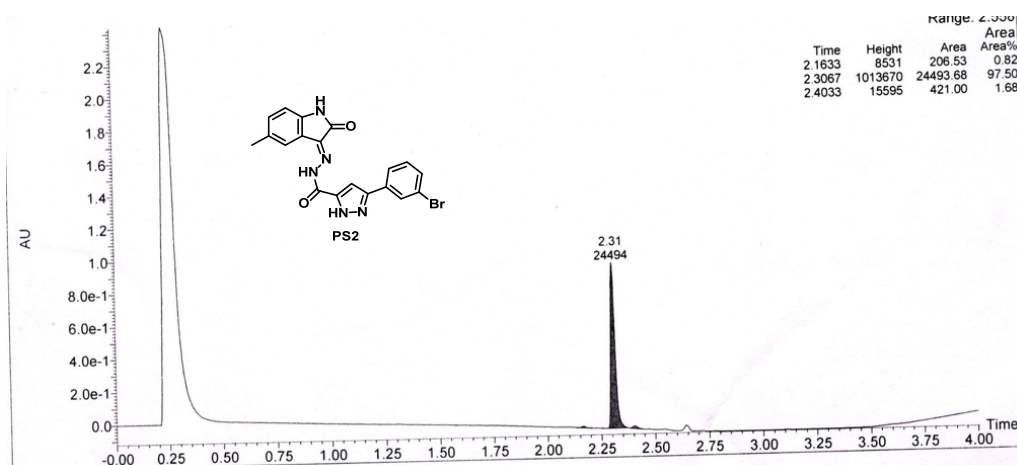

Purity of compound PS2

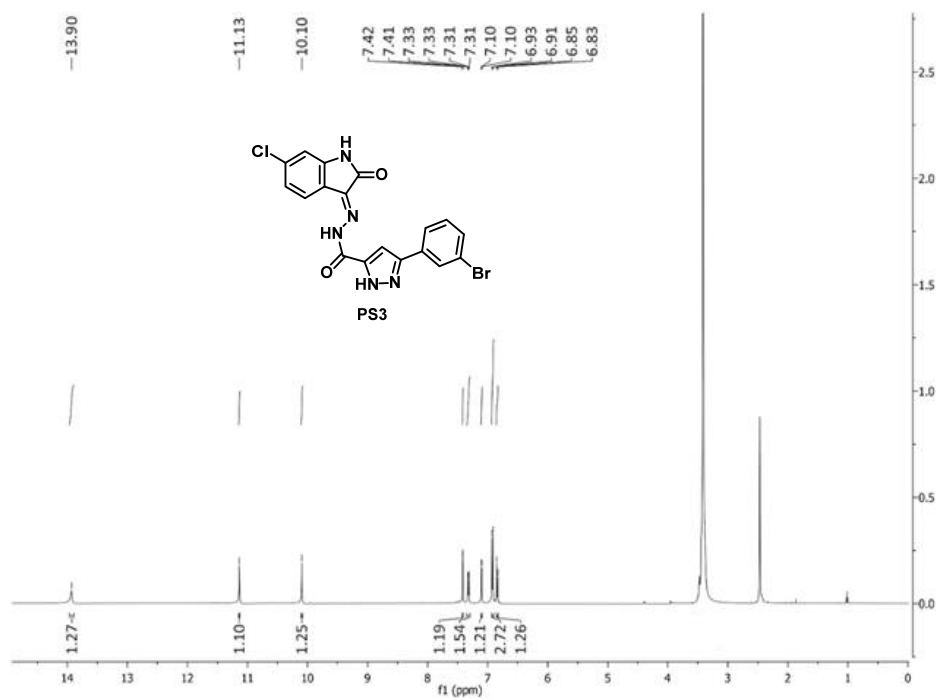

<sup>1</sup>H of compound PS3

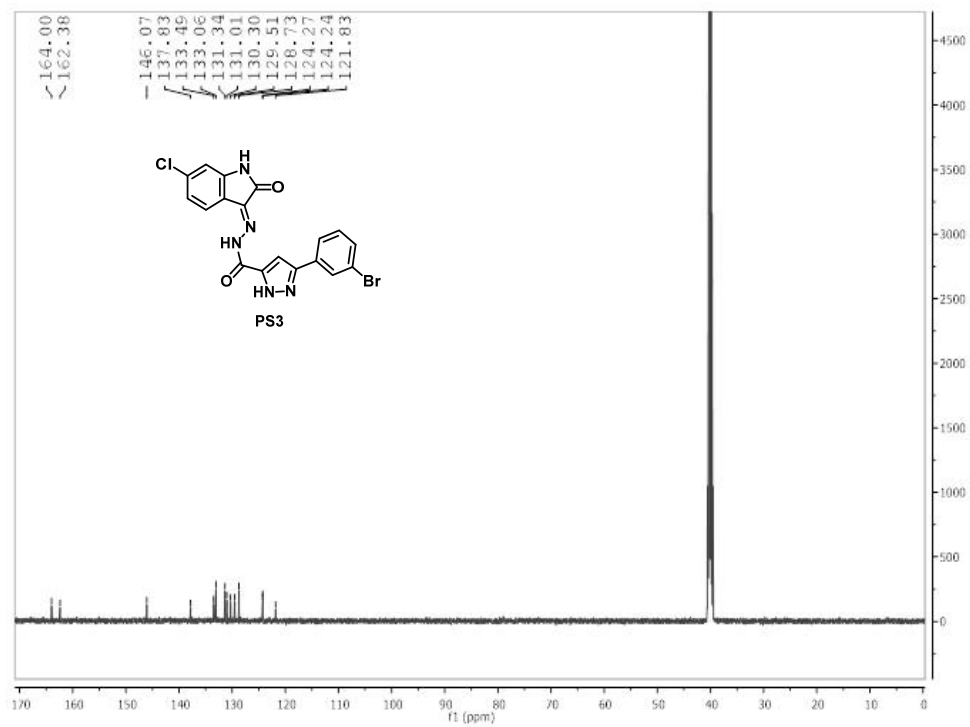

<sup>13</sup>C of compound PS3

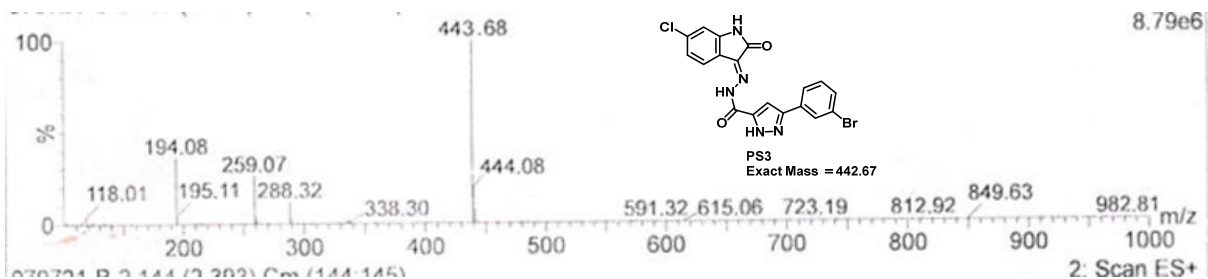

**Mass spectra of compound PS3**

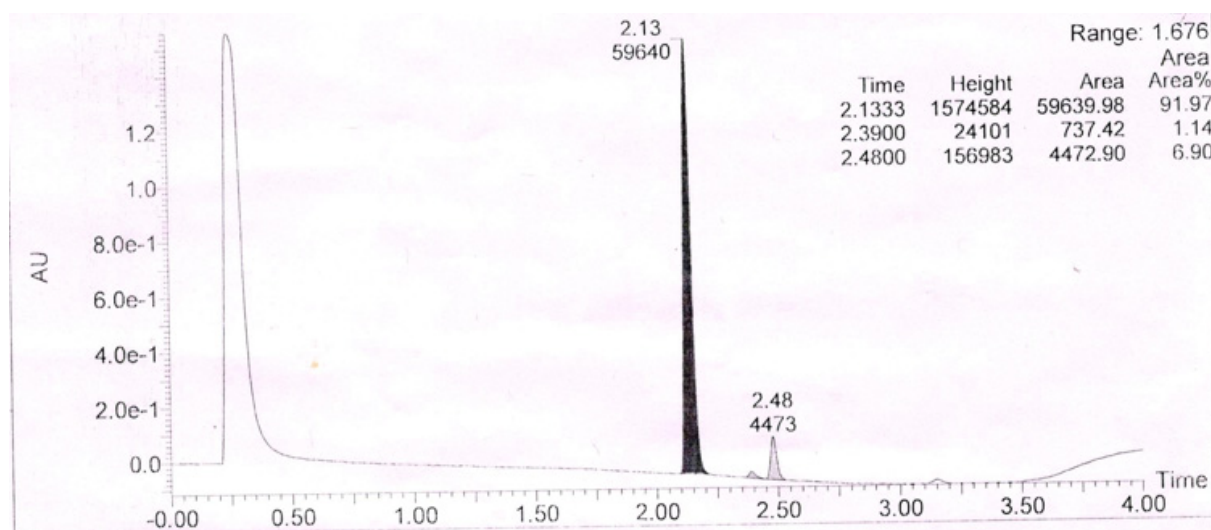

**Purity of compound PS3**



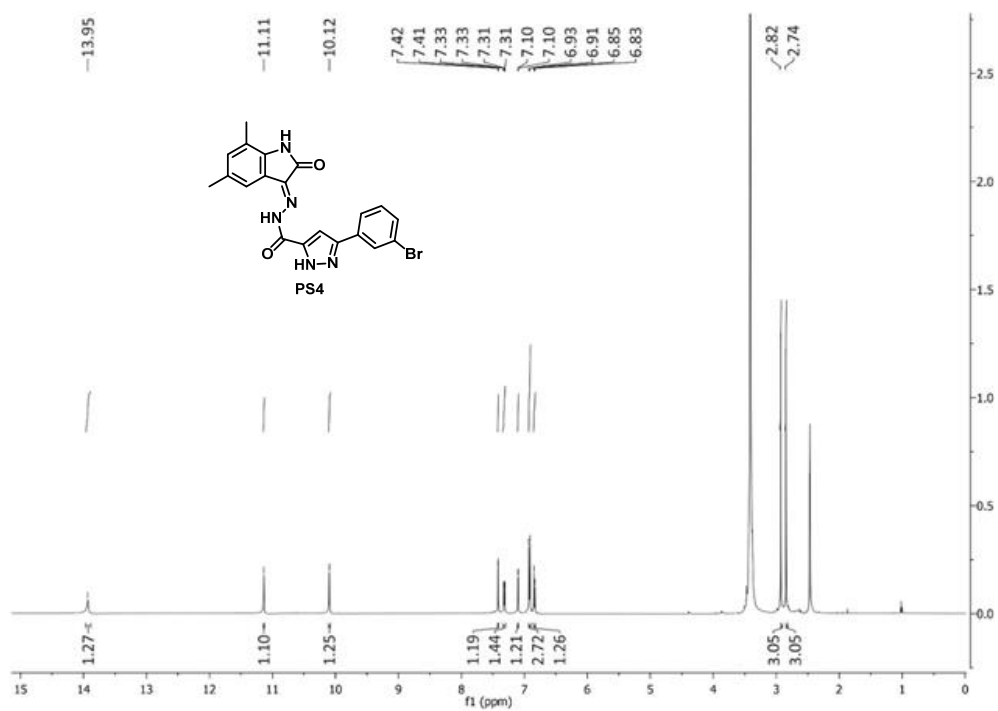

<sup>1</sup>H of compound PS4

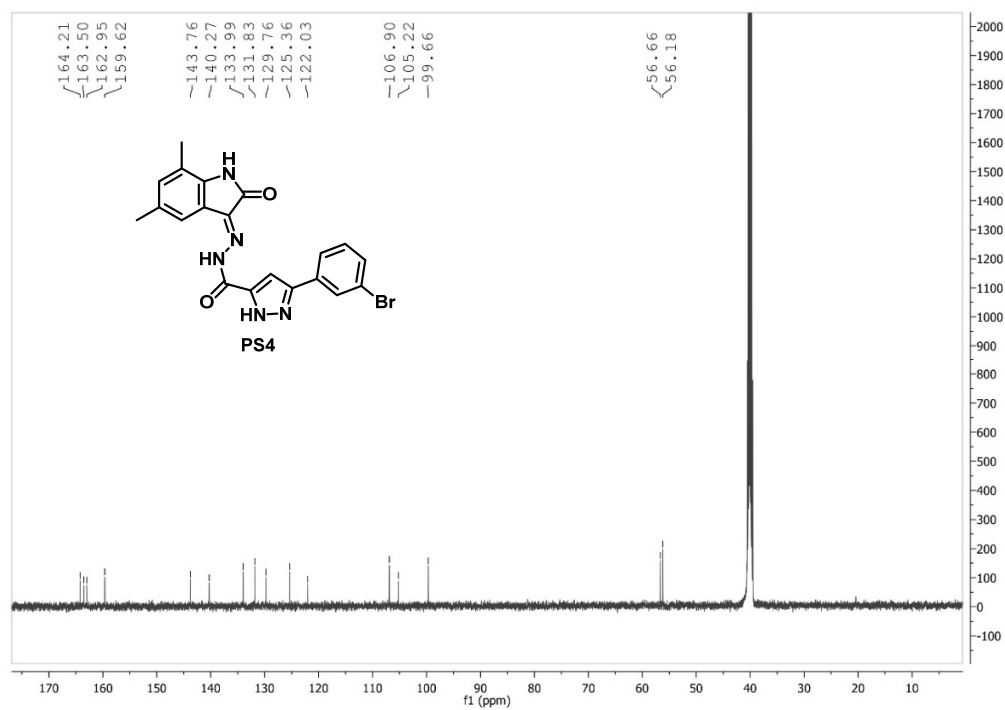

<sup>13</sup>C of compound PS4
